# Supplementary material
Source: HighWire-hosted journal article supplement (https://molpharm.aspetjournals.org/highwire/filestream/82432/field_highwire_adjunct_files/0/Supplemental_112441.pdf)
Supplement: Supplemental_112441.pdf [file Supplemental_112441.pdf]

**Molecular Pharmacology: Molecular determinants of the differential modulation of Ca<sub>v</sub>1.2 and Ca<sub>v</sub>1.3 by nifedipine and FPL64176**

Yuchen Wang, Shiqi Tang, Kyle E. Harvey, Amy E. Salyer, T. August Li, Emily K. Rantz, Markus A. Lill, and Gregory H. Hockerman

**A**

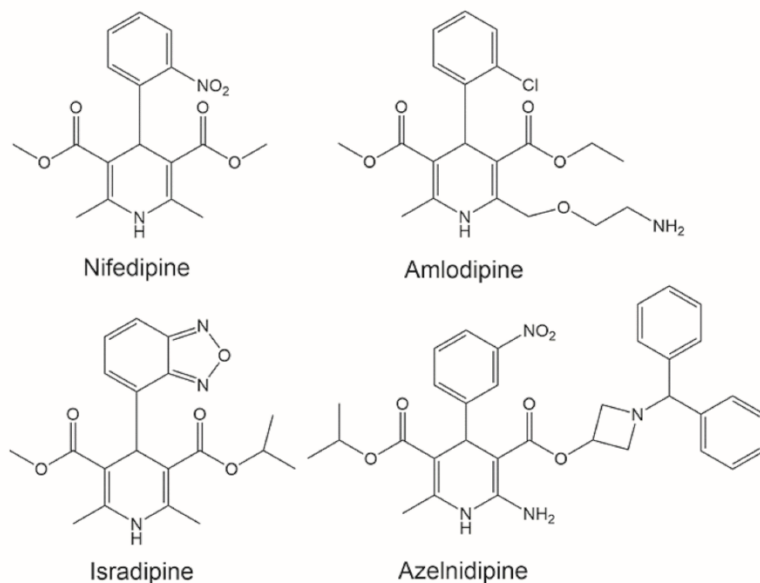

**B**

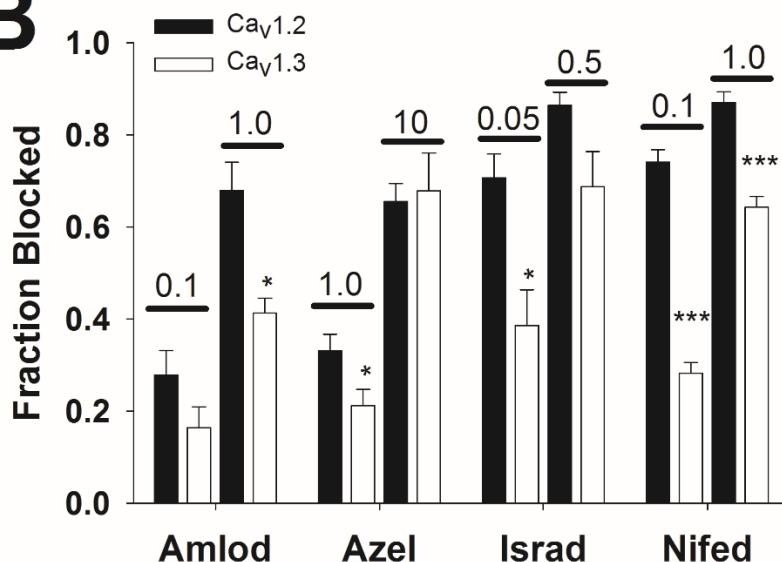

**Supplemental Figure 1. Differential Block of Ca<sub>v</sub>1.2 and Ca<sub>v</sub>1.3 by structurally distinct dihydropyridines-** **A)** Chemical structures of nifedipine, amlodipine, isradipine, and azelnidipine. **B)** Block of Ca<sub>v</sub>1.2 and Ca<sub>v</sub>1.3 by two concentrations of each of the dihydropyridine drugs shown in A. Concentrations are given in μM. Note that each drug is significantly more potent in blocking Ca<sub>v</sub>1.2 compared to Ca<sub>v</sub>1.3. Amlodipine (1 μM: *P* < 0.05)(*N* = 4) Azelnidipine (1 μM: *P* < 0.05)(*N* = 5) Isradipine (50 nM; *P* < 0.01)(*N* = 5) Nifedipine (100 nM: *P* < 0.001)(*N* = 4) (1 μM: *P* < 0.001)(*N* = 4)

**Molecular Pharmacology: Molecular determinants of the differential modulation of  $Ca_v1.2$  and  $Ca_v1.3$  by nifedipine and FPL64176**

Yuchen Wang, Shiqi Tang, Kyle E. Harvey, Amy E. Salyer, T. August Li, Emily K. Rantz, Markus A. Lill, and Gregory H. Hockerman

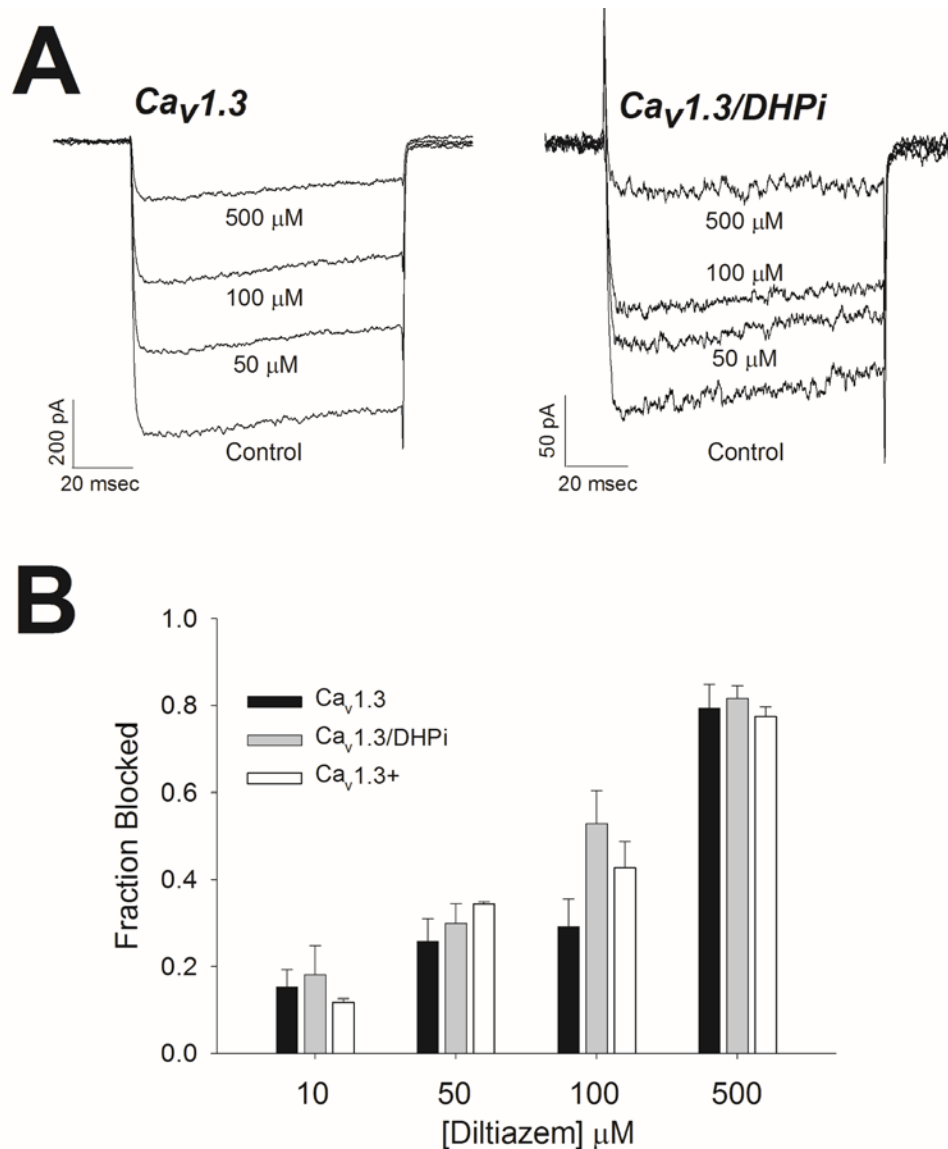

**Supplemental Figure 2. Block of  $Ca_v1.3$ ,  $Ca_v1.3/DHPi$ , and  $Ca_v1.3+$  by the benzothiazepine diltiazem-** **A)** Example current traces showing dose-dependent block of current conducted by  $Ca_v1.3$  and  $Ca_v1.3/DHPi$  by diltiazem. **B)** Fraction of current blocked by 10, 50, 100, and 500 μM diltiazem in  $Ca_v1.3$ ,  $Ca_v1.3/DHPi$ , and  $Ca_v1.3+$ . There was no significant difference in the fraction of current blocked in each of the three channel constructs at any diltiazem concentration (*one-way* ANOVA) ( $n = 3-7$ ).

**Molecular Pharmacology: Molecular determinants of the differential modulation of Ca<sub>v</sub>1.2 and Ca<sub>v</sub>1.3 by nifedipine and FPL64176**

Yuchen Wang, Shiqi Tang, Kyle E. Harvey, Amy E. Salyer, T. August Li, Emily K. Rantz, Markus A. Lill, and Gregory H. Hockerman

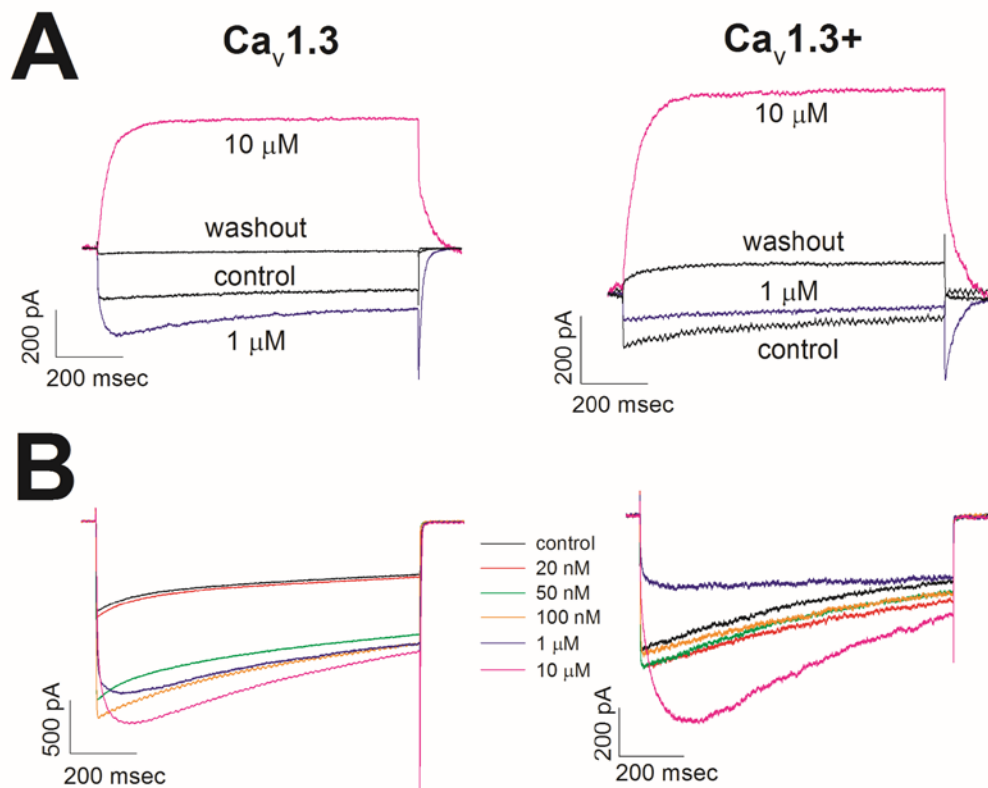

**Supplemental Figure 3. Effect of FPL 64176 on current conducted by Ca<sub>v</sub>1.3 and Ca<sub>v</sub>1.3+ -**

**A)** Example traces of current through Ca<sub>v</sub>1.3 or Ca<sub>v</sub>1.3+ elicited with a step to 0 mV from a holding potential of -80 mV using the standard solution set. FPL 64176 at the indicated concentration was applied via extracellular perfusion as described in Materials and Methods. **B)** Example dose response experiments with Ca<sub>v</sub>1.3+ and FPL 64176 using the NMDG-balanced solution set described in Materials and Methods. Note the increase in current amplitude at 50 and 100 nM FPL, and reduction in current amplitude at 1 μM, even though channel activation is slower than at lower concentrations.
